# Supplementary material for: Chromatin-enriched RNAs mark active and repressive cis-regulation: An analysis of nuclear RNA-seq
Source: PubMed Central journal article supplement (PMC7034927; doi:10.1371/journal.pcbi.1007119), 2020-02-10
Supplement: pcbi.1007119.s009.pdf [file pcbi.1007119.s009.pdf]

**S1 Table: Publically accessible omics datasets analyzed in this study.**

| <b>DATASET_NAME</b>        | <b>SEQ TYPE</b> | <b>GENO ME</b> | <b>GEO_ SERIES</b> | <b>GEO_ ACCESSION</b> | <b>ENCODE_ ACCESSION</b> | <b>RNA-seq running spots (seq depth)</b> |
|----------------------------|-----------------|----------------|--------------------|-----------------------|--------------------------|------------------------------------------|
| HEK293_CPE1                | RNA-seq         | HG38           | GSE66478           | GSM1623143            |                          | 67.2M                                    |
| HEK293_CPE2                | RNA-seq         | HG38           | GSE66478           | GSM1623144            |                          | 98M                                      |
| HEK293_CPE3                | RNA-seq         | HG38           | GSE66478           | GSM1623145            |                          | 60.5M                                    |
| HEK293_SNE1                | RNA-seq         | HG38           | GSE66478           | GSM1623140            |                          | 64.6M                                    |
| HEK293_SNE2                | RNA-seq         | HG38           | GSE66478           | GSM1623141            |                          | 73.4M                                    |
| HEK293_SNE3                | RNA-seq         | HG38           | GSE66478           | GSM1623142            |                          | 61.4M                                    |
| H1_CPE1                    | RNA-seq         | HG38           | GSE83531           | GSM2208157            |                          | 30.6M                                    |
| H1_CPE2                    | RNA-seq         | HG38           | GSE83531           | GSM2208158            |                          | 27.9M                                    |
| H1_CPE3                    | RNA-seq         | HG38           | GSE83531           | GSM2208159            |                          | 29.8M                                    |
| H1_SNE1                    | RNA-seq         | HG38           | GSE83531           | GSM2208160            |                          | 26.4M                                    |
| H1_SNE2                    | RNA-seq         | HG38           | GSE83531           | GSM2208161            |                          | 31.3M                                    |
| H1_SNE3                    | RNA-seq         | HG38           | GSE83531           | GSM2208162            |                          | 25.9M                                    |
| K562_CPE1                  | RNA-seq         | HG38           | GSE83531           | GSM2208147            |                          | 33.3M                                    |
| K562_CPE2                  | RNA-seq         | HG38           | GSE83531           | GSM2208148            |                          | 31.3M                                    |
| K562_CPE3                  | RNA-seq         | HG38           | GSE83531           | GSM2208149            |                          | 41.4M                                    |
| K562_SNE1                  | RNA-seq         | HG38           | GSE83531           | GSM2208150            |                          | 32M                                      |
| K562_SNE2                  | RNA-seq         | HG38           | GSE83531           | GSM2208151            |                          | 34.2M                                    |
| K562_SNE3                  | RNA-seq         | HG38           | GSE83531           | GSM2208152            |                          | 30.1M                                    |
| K562_total_RNA-seq         | RNA-seq         | HG38           | GSE78558           | GSM2072364            | ENCFF010QAI              | 78.2M                                    |
| K562_total_RNA-seq         | RNA-seq         | HG38           | GSE78558           | GSM2072365            | ENCFF345SBQ              | 58.3M                                    |
| K562_total_RNA-seq         | RNA-seq         | HG38           | GSE88622           | GSM2344296            | ENCFF509AOR              | 39.1M                                    |
| K562_total_RNA-seq         | RNA-seq         | HG38           | GSE88622           | GSM2344295            | ENCFF745GPL              | 37M                                      |
| K562_nuclear_polyA_RNA-seq | RNA-seq         | HG38           | GSE88339           | GSM2343814            | ENCLB278NDX              | 44.3M                                    |
| K562_nuclear_polyA_RNA-seq | RNA-seq         | HG38           | GSE88339           | GSM2343815            | ENCLB538THW              | 47.4M                                    |
| K562_nuclear_total_RNA-seq | RNA-seq         | HG38           | GSE87982           | GSM2343135            | ENCLB873LMQ              | 24.8M                                    |
| K562_nuclear_total_RNA-seq | RNA-seq         | HG38           | GSE87982           | GSM2343136            | ENCLB645CDM              | 24.8M                                    |
| K562 GRO-Seq               | GRO-seq         | HG19           | GSE60454           | GSM1480325            |                          |                                          |
| K562_ATAC_1                | ATAC-seq        | HG19           | GSE70482           | GSM1782764            |                          |                                          |
| K562_ATAC_2                | ATAC-seq        | HG19           | GSE70482           | GSM1782765            |                          |                                          |
| K562_POL2_1                | ChIP-seq        | HG38           | GSE31477           | GSM935389             | ENCFF730DLS              |                                          |
| K562_POL2_2                | ChIP-seq        | HG38           | GSE31477           | GSM935475             | ENCFF668VIK              |                                          |
| K562_POL2_3                | ChIP-seq        | HG38           | GSE91721           | GSM2423412/1          | ENCFF285MBX              |                                          |
| K562_POL2_4                | ChIP-seq        | HG38           | GSE32465           | GSM803410             | ENCFF182YZG              |                                          |
| K562_POL2_5                | ChIP-seq        | HG38           | GSE31477           | GSM935473             | ENCFF099NYA              |                                          |
| K562_POL2_6                | ChIP-seq        | HG38           | GSE91426           |                       | ENCFF881ONC              |                                          |

|                 |          |      |          |           |             |
|-----------------|----------|------|----------|-----------|-------------|
| K562_H3K27me3_1 | ChIP-seq | HG38 | GSE29611 | GSM733658 | ENCFF049HUP |
| K562_H3K27me3_2 | ChIP-seq | HG38 | GSE31755 | GSM788088 | ENCFF031FSF |
| K562_H3K27ac    | ChIP-seq | HG38 | GSE29611 | GSM733656 | ENCFF038DDS |
| K562_H3K9me3    | ChIP-seq | HG38 | GSE29611 | GSM733776 | ENCFF371GMJ |
| K562_H3K4me3_1  | ChIP-seq | HG38 | GSE31755 | GSM788087 | ENCFF961SPZ |
| K562_H3K4me3_2  | ChIP-seq | HG38 | GSE29611 | GSM733680 | ENCFF909PMV |
| K562_H3K4me3_3  | ChIP-seq | HG38 | GSE96303 |           | ENCFF616DLO |
| K562_H3K4me3_4  | ChIP-seq | HG38 | GSE35583 | GSM945165 | ENCFF148POZ |
| K562_H3K4me1    | ChIP-seq | HG38 | GSE31755 | GSM788085 | ENCFF159VKJ |
| K562_EP300      | ChIP-seq | HG38 | GSE31477 | GSM935401 | ENCFF755HCK |
| K562_SUZ12      | ChIP-seq | HG38 | GSE91742 |           | ENCSR412CTM |
| K562_EZH2       | ChIP-seq | HG38 |          |           | ENCSR000AQE |

While multiple resource IDs are available, we downloaded it from the ENCODE by ENCODE\_ACCESSION IDs.

While only hg19 landscape is available, we liftover its landscape to the hg38 genome.
