# Supplementary material for: Chromatin-enriched RNAs mark active and repressive cis-regulation: An analysis of nuclear RNA-seq
Source: PubMed Central journal article supplement (PMC7034927; doi:10.1371/journal.pcbi.1007119), 2020-02-10
Supplement: pcbi.1007119.s012.pdf [file pcbi.1007119.s012.pdf]

**S4 Table. Canonical cheRNAs can be better identified by Tuxedo and Concatenating methods.** Colored cells are validated in tissue-specific experiments and used as gold standards.

| 16 alidations                    |              |               |                    | HEK293  |        |         |      | K562   |        |         |      |
|----------------------------------|--------------|---------------|--------------------|---------|--------|---------|------|--------|--------|---------|------|
| result                           | cell         | method        | RNA Symbol         | Werner  | Tuxedo | Concat. | Taco | Werner | Tuxedo | Concat. | Taco |
| CPE                              | HEK293       | RT-PCR        | KCNQ10T1           | CPE     | CPE    | CPE     | None |        |        |         |      |
|                                  | HEK293       | RT-PCR        | XIST               | HI-DATA | CPE    | CPE     | CPE  |        |        |         |      |
|                                  | HEK293 /K562 | RT-PCR        | PVT1               | -       | CPE    | CPE     | -    | CPE    | CPE    | CPE     | CPE  |
|                                  | K562         | function      | BONIFACIO          |         |        |         |      | CPE    | CPE    | CPE     | CPE  |
|                                  | K562         | function      | ILYICH             |         |        |         |      | CPE    | CPE    | CPE     | CPE  |
|                                  | K562         | function      | HIDALGO            |         |        |         |      | -      | CPE    | CPE     | CPE  |
|                                  |              |               |                    |         |        |         |      |        |        |         |      |
| SNE                              | HEK293       | RT-PCR        | GAPDH              | SNE     | SNE    | SNE     | SNE  |        |        |         |      |
|                                  | HEK293       | RT-PCR        | ACTB               | SNE     | SNE    | SNE     | SNE  |        |        |         |      |
|                                  | HEK293 /K562 | RT-PCR        | MYC                | SNE     | SNE    | SNE     | SNE  | SNE    | SNE    | SNE     | SNE  |
|                                  | K562         | RNA-seq reads | B3GNT2             |         |        |         |      | SNE    | SNE    | SNE     | SNE  |
|                                  | K562         | RNA-seq reads | IL6                |         |        |         |      | -      | -      | -       | NA   |
|                                  | K562         | RNA-seq reads | PDCD6IP            |         |        |         |      | -      | SNE    | SNE     | SNE  |
| intermediate                     | HEK293       | RT-PCR        | HOTAIR             | SNE     | -      | -       | NonA |        |        |         |      |
|                                  | HEK293       | RT-PCR        | DLX6-AS1, Evf-2_5p | -       | CPE    | CPE     | NonA |        |        |         |      |
| <b>correct prediction:</b>       |              |               |                    | 5       | 7      | 7       | 4    | 5      | 7      | 7       | 7    |
| <b>number of gold standarad:</b> |              |               |                    | 8       | 8      | 8       | 8    | 8      | 8      | 8       | 8    |
| <b>PPV</b>                       |              |               |                    | 0.63    | 0.88   | 0.88    | 0.50 | 0.63   | 0.88   | 0.88    | 0.88 |

**NonA:** not assembled

**NA:** not tested because of low expression level

**HIDATA:** not tested by Cuffdiff because of high expression level

**"-":** tested but not significantly differentially expressed

**PPV:** number of correct predictions /number of gold standard in each cell line (8 gold standard in HEK293 while 8 gold standard in K562)
